# Supplementary material for: Enhanced electrochemical performance of lithium ion batteries using Sb2S3 nanorods wrapped in graphene nanosheets as anode materials
Source: Royal Society of Chemistry journal article supplement (doi:10.1039/c7nr09441h), 2018-01-01
Supplement: c7nr09441h1.pdf [file c7nr09441h1.pdf]

Electronic Supplementary Information (ESI) for

## Enhanced electrochemical performance of lithium ion batteries using $\text{Sb}_2\text{S}_3$ nanorods and graphene composites as anode materials

Yucheng Dong,<sup>a,b</sup> Shiliu Yang,<sup>a</sup> Zhenyu Zhang,<sup>a</sup> Jong-Min Lee,<sup>b\*</sup> Juan Antonio Zapien<sup>a\*</sup>

<sup>a</sup> Center of super-Diamond and Advanced Films (COSDAF), Department of Physics and Materials Science, City University of Hong Kong, 83 Tat Chee Avenue, Kowloon, Hong Kong

<sup>b</sup>School of Chemical & Biomedical Engineering, Nanyang Technological University, 62 Nanyang Drive, Singapore 637459

E-mail: [apjajs@cityu.edu.hk](mailto:apjajs@cityu.edu.hk), [jmlee@ntu.edu.sg](mailto:jmlee@ntu.edu.sg),

### Synthesis of graphene oxide

First, the graphite powder was oxidized using 0.9 g  $\text{NaNO}_3$  and 37 mL of concentrated  $\text{H}_2\text{SO}_4$  that were added to 1 g graphite powder cooled in an ice bath. This mixture was continuously stirred while 5 g of  $\text{KMnO}_4$  was added slowly over 1 h. It was left to stir for 2 h in the ice bath, and then removed and left for 4 days under continuous stirring. A black viscous liquid was obtained and 100 mL of deionized water was added over 30 min while stirring continuously. The mixture was stirred for a further 2 h, 10 mL  $\text{H}_2\text{O}_2$  (30wt% aqueous solution) was slowly added and then the mixture was left to stir for another 2 h. The resulting oxidized material was washed three times by 10wt% diluted hydrochloric acid and then washed by deionized water till the pondus hydrogenii (pH) value was close to 7. A light yellow GO powder was obtained after freeze drying for 12 h.

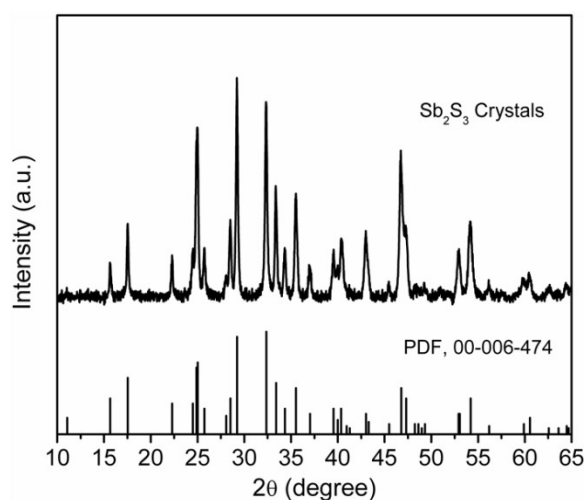

Fig. 1S XRD pattern of  $\text{Sb}_2\text{S}_3$  crystals.

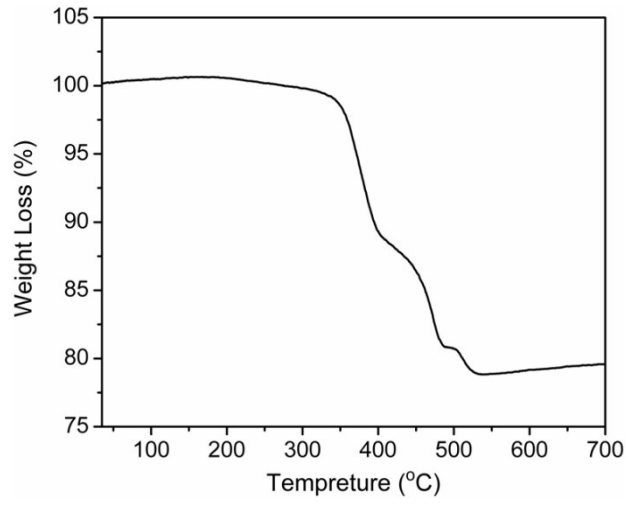

Fig. 2S TGA curve of  $Sb_2S_3/G$  composites.

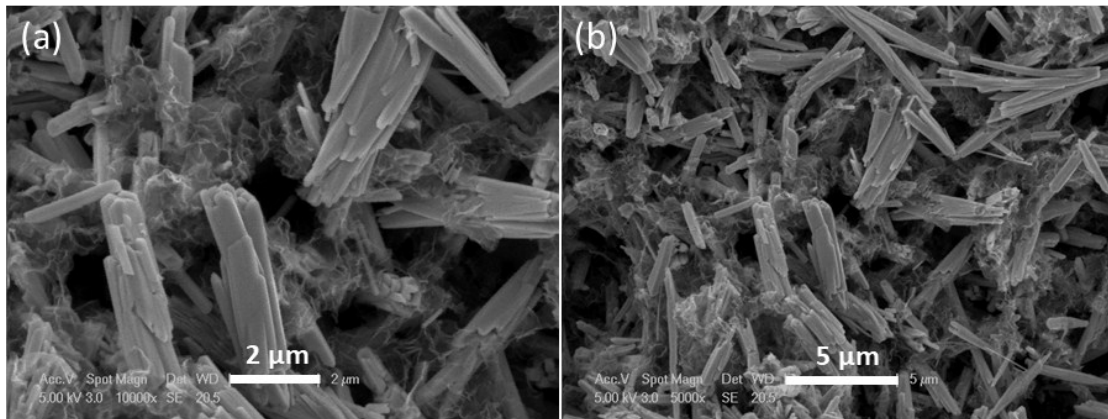

Fig. 3S SEM images of  $Sb_2S_3/G$  composites with half amount of GO with different magnification.

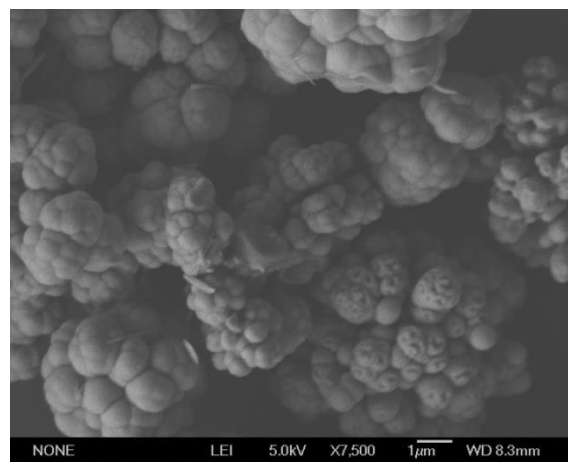

Fig. 4S SEM image of  $Sb_2S_3$  crystals.

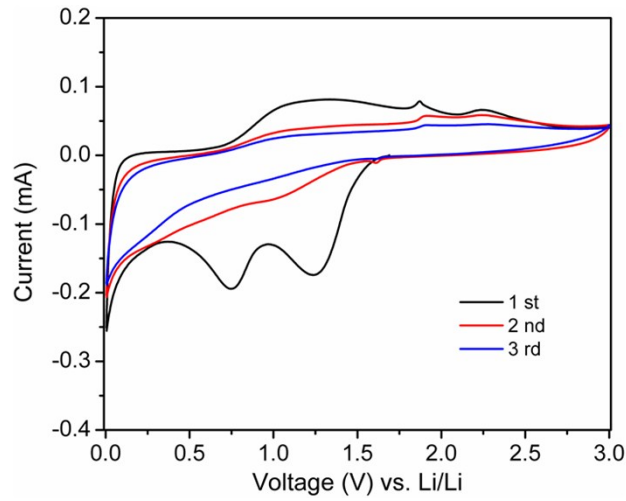

Fig. 5S CV of  $\text{Sb}_2\text{S}_3$  crystals at a scan rate of  $0.1 \text{ mV s}^{-1}$  in the voltage range of 0.01-3 V (vs.  $\text{Li}^+/\text{Li}$ ).

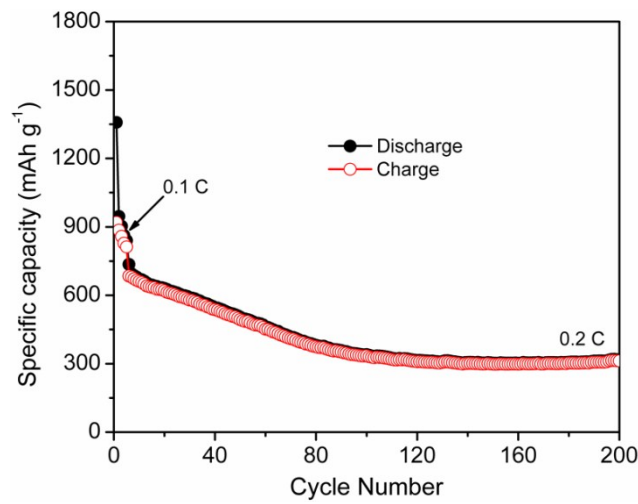

Fig. 6S Cyclic stability of  $\text{Sb}_2\text{S}_3/\text{HG}$  composites at various current rates.

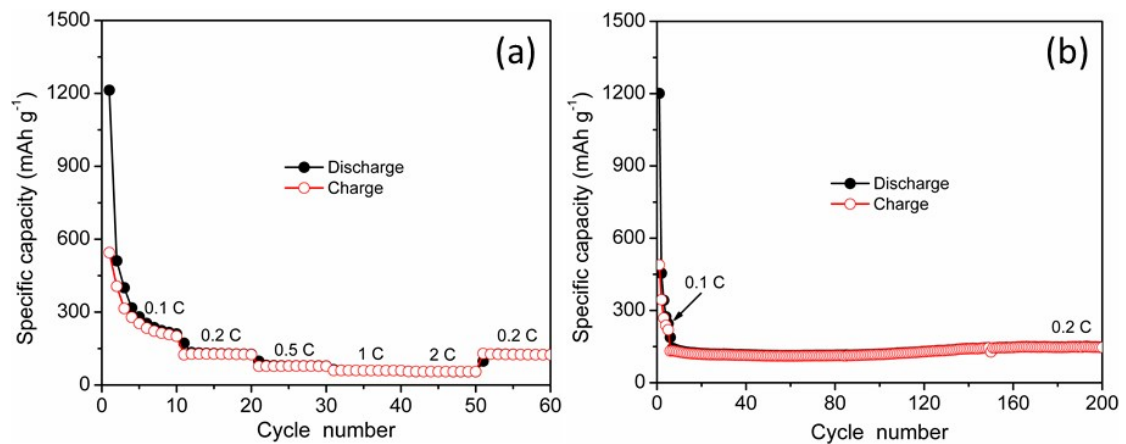

Fig. 7S (a) Rate capacity of  $\text{Sb}_2\text{S}_3$  crystals at various current rates; and (b) cyclic stability of  $\text{Sb}_2\text{S}_3$  crystals.

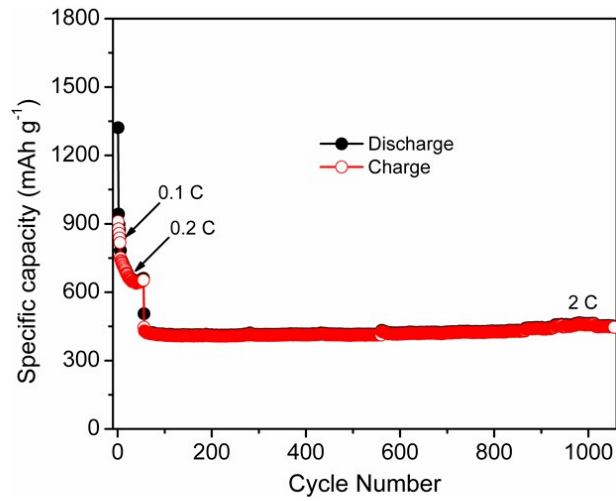

Fig. 8S Cyclic stability of  $\text{Sb}_2\text{S}_3/\text{G}$  composites tested at various current rates.

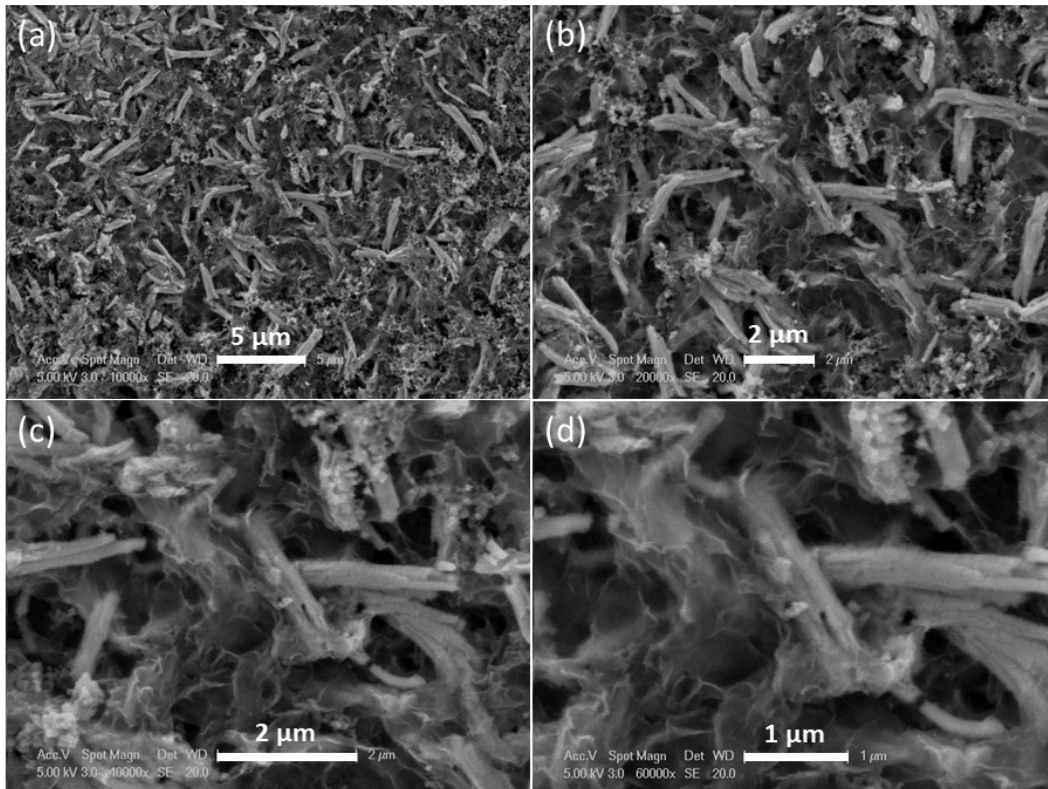

Fig. 9S SEM image of  $\text{Sb}_2\text{S}_3/\text{G}$  composites with different magnification after 100 cycles at a current rate of 0.2C
